# Supplementary material for: The NMR signature of gluconoylation: a frequent N-terminal modification of isotope-labeled proteins
Source: PubMed Central journal article supplement (PMC6441400; doi:10.1007/s10858-019-00228-6), 2019-02-08
Supplement: 10858_2019_228_MOESM1_ESM.pdf [file 10858_2019_228_MOESM1_ESM.pdf]

## SUPPLEMENTARY MATERIAL

### The NMR signature of gluconoylation - a frequent N-terminal modification of isotope-labeled proteins

David Schweida<sup>1</sup>, Pierre Barraud<sup>2,3</sup>, Christof Regl<sup>1,4</sup>, Fionna E. Loughlin<sup>2,5</sup>, Christian G. Huber<sup>1,4</sup>, Chiara Cabrele<sup>1,4</sup>, Mario Schubert<sup>1,2,4\*</sup>

<sup>1</sup> Department of Biosciences, University of Salzburg, Billrothstr. 11, 5020 Salzburg, Austria

<sup>2</sup> Institute of Molecular Biology and Biophysics, ETH Zürich, CH-8093 Zürich, Switzerland

<sup>3</sup> Institut de biologie physico-chimique (IBPC), UMR 8261 CNRS, Université Paris Diderot, 13 rue Pierre et Marie Curie, 75005 Paris, France.

<sup>4</sup> Christian Doppler Laboratory for Innovative Tools for Biosimilar Characterization, University of Salzburg, Hellbrunnerstrasse 34, 5020 Salzburg, Austria

<sup>5</sup> Monash Biomedicine Discovery Institute, Department of Biochemistry & Molecular Biology, Monash University, Victoria 3800, Australia

#### Content:

|                                |        |
|--------------------------------|--------|
| Supplementary Figures S1 to S4 | page 2 |
| Supplementary Table S1         | page 6 |
| Supplementary References       | page 7 |

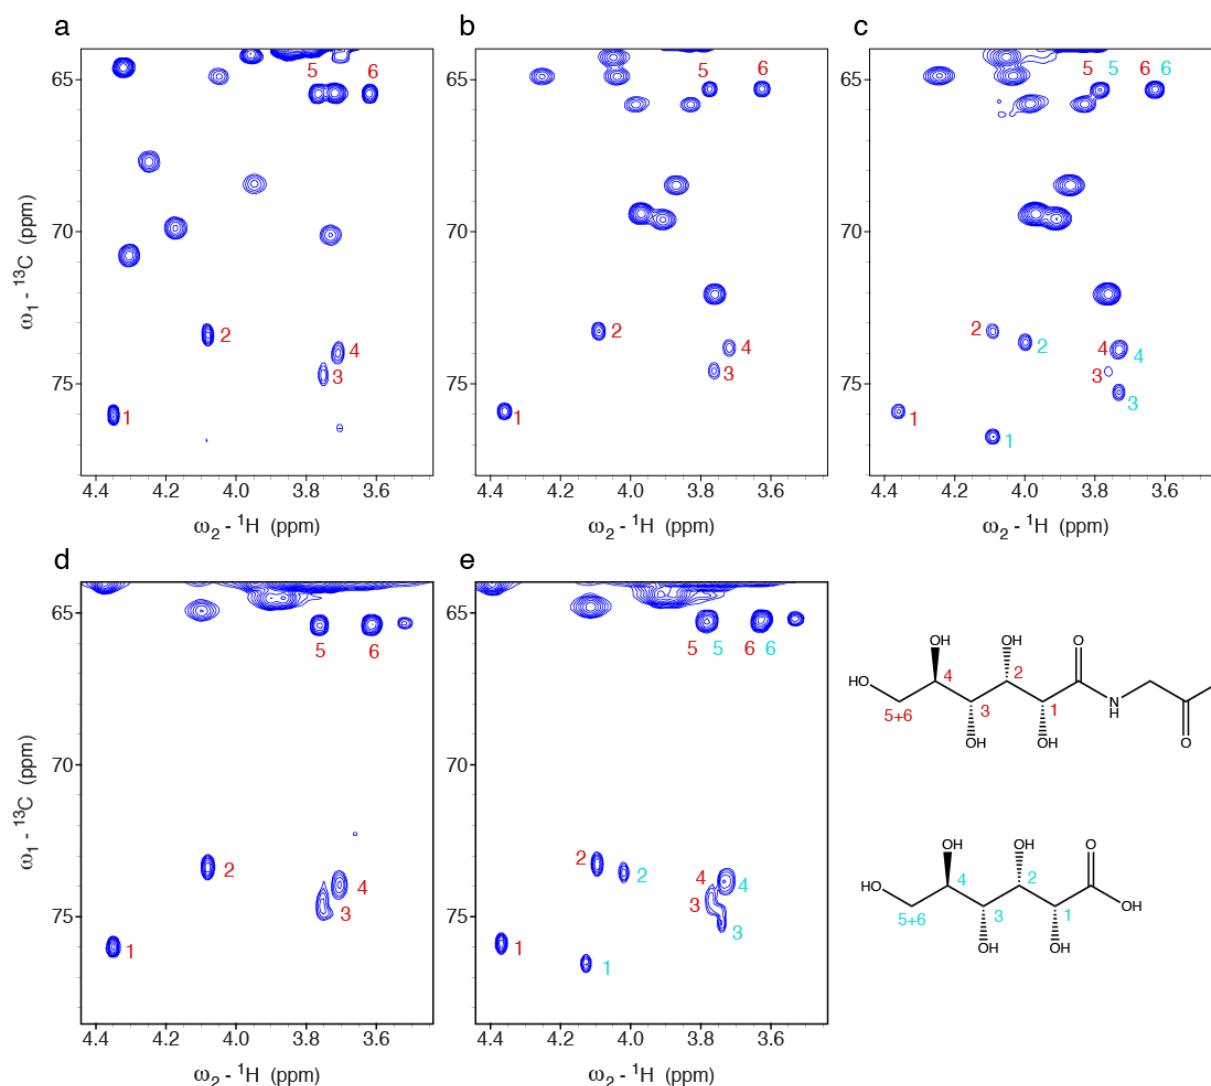

**Supplementary Figure S1.**  $^1\text{H}$ - $^{13}\text{C}$  HSQC spectra of a variety of additional  $^{13}\text{C}/^{15}\text{N}$  labeled proteins. (a) Spectrum of a fresh sample of the RRM1 domain of hnRNP A1 in complex with the RNA UUAGGUC<sup>1</sup> recorded at 303 K, pH 6.5 and 750 MHz. (b) Spectrum of a fresh sample of the RRM2 domain of hnRNP A1 in complex with the RNA UCAGUU<sup>1</sup> recorded at 303 K, pH 6.5 and 900 MHz. (c) Spectrum of the same sample of panel b recorded after 5 days of triple resonance measurements at 303 K, pH 6.5 and 900 MHz. (d) Spectrum of a fresh sample of the two zinc knuckles of Lin28 in complex with the RNA AGGAGAU recorded at 303 K, pH 5.6 at 700 MHz in <sup>2</sup>. (e) Spectrum of the same sample of panel d after 4 days at 303 K.

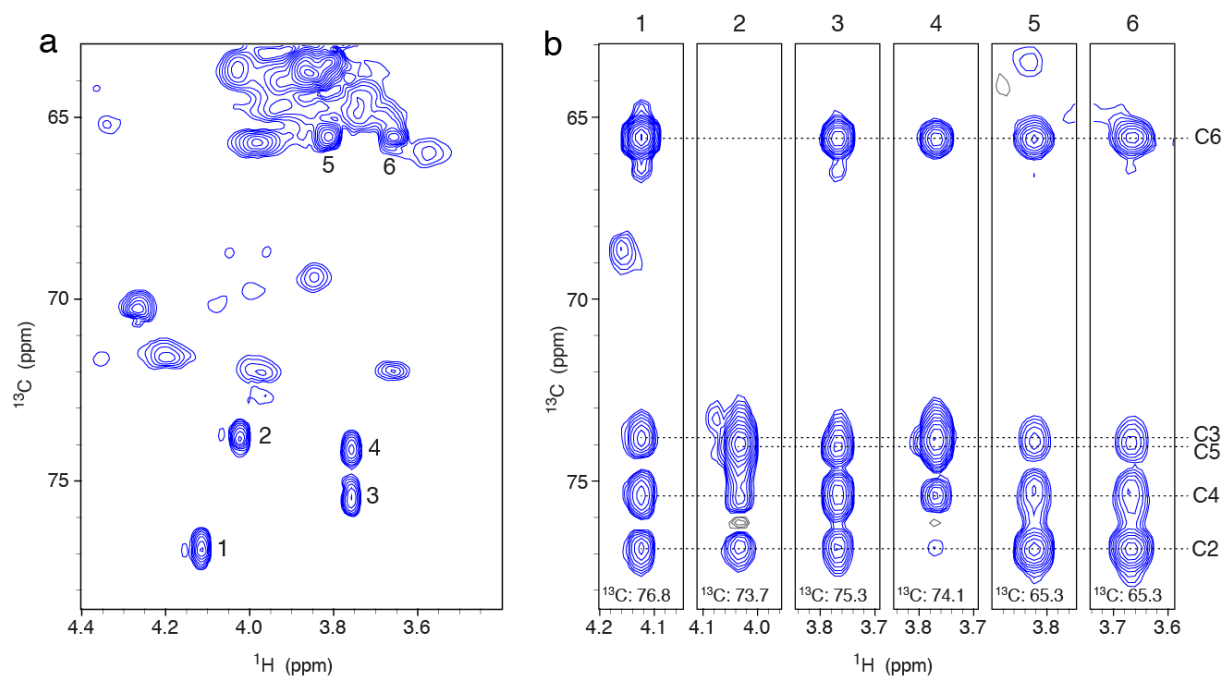

**Supplementary Figure S2.** Assignment of the hydrolysis product gluconate. (a) 2D  $^1\text{H}$ - $^{13}\text{C}$  HSQC of  $^{13}\text{C}/^{15}\text{N}$ -labeled CCL2 (pH 5.8) expressed in M9 minimal medium after 6 weeks of NMR measurements at 310 K, recorded at 700 MHz and 310 K. (b) 3D (H)CCH-TOCSY spectrum of the same sample as in panel a.

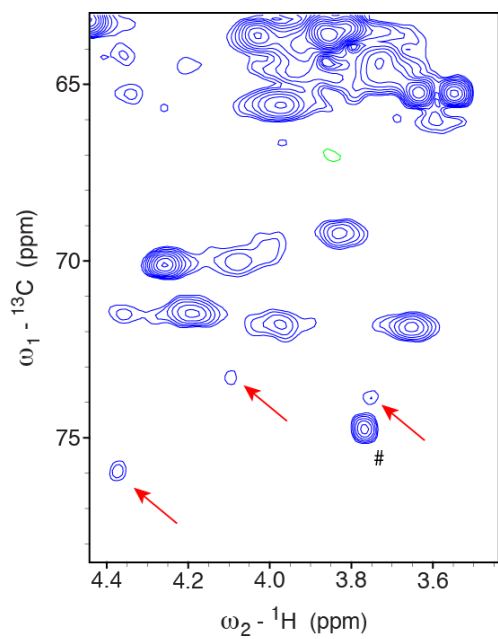

**Supplementary Figure S3.**  $^1\text{H}$ - $^{13}\text{C}$  HSQC of unlabeled CCL2 expressed in LB medium (pH 5.8), measured at  $^{13}\text{C}$  natural abundance, at 600 MHz and 310 K. The arrows indicate characteristic and well isolated signals of gluconoyl that are present with low intensity.

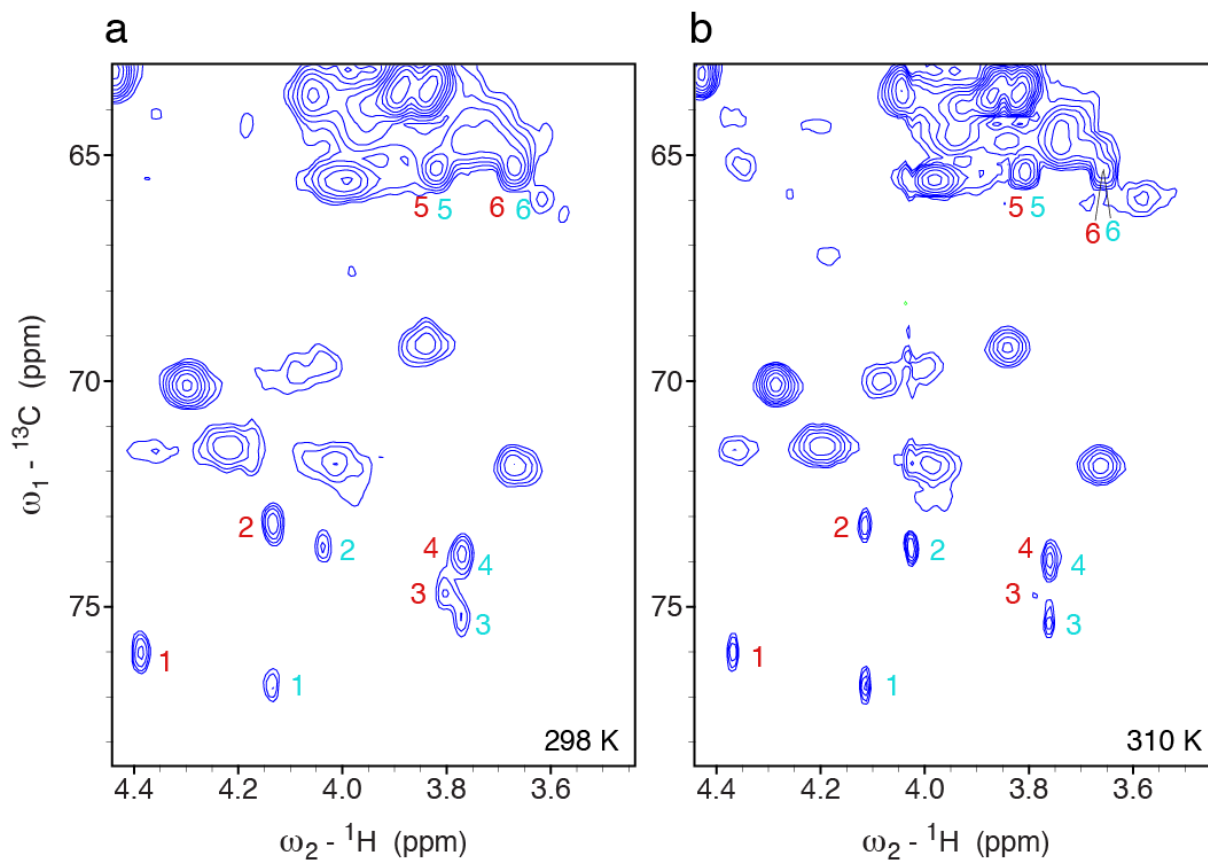

**Supplementary Figure S4.**  $^1\text{H}$ - $^{13}\text{C}$  HSQC of  $^{13}\text{C}/^{15}\text{N}$ -labeled CCL2 (pH 7.5, 0.25 mM) measured at 600 MHz and two different temperatures. (a) Spectrum measured at 298 K with 4 transients and 1024 $\times$ 350 points. (b) Spectrum recorded at 310 K with 16 transients and 2024 $\times$ 512 points.

**Supplementary Table S1.**  $^1\text{H}$  and  $^{13}\text{C}$  chemical shifts of gluconoyl and gluconate at different pH values and different temperatures.

| Nucleus | Gluconoyl       |                 |                 |                 | Gluconate       |                 |                 |                 |
|---------|-----------------|-----------------|-----------------|-----------------|-----------------|-----------------|-----------------|-----------------|
|         | pH 5.6<br>303 K | pH 6.5<br>303 K | pH 7.5<br>310 K | pH 7.5<br>298 K | pH 5.6<br>303 K | pH 6.5<br>303 K | pH 7.5<br>310 K | pH 7.5<br>298 K |
| C2      | 75.9            | 75.9            | 76.0            | 76.0            | 76.7            | 76.7            | 76.8            | 76.8            |
| C3      | 73.3            | 73.3            | 73.2            | 73.2            | 73.6            | 73.6            | 73.7            | 73.7            |
| C4      | 74.5            | 74.6            | 74.7            | 74.7            | 75.2            | 75.3            | 75.4            | 75.2            |
| C5      | 73.9            | 73.8            | 74.0            | 73.8            | 73.9            | 73.9            | 74.0            | 73.8            |
| C6      | 65.3            | 65.3            | 65.4            | 65.3            | 65.3            | 65.3            | 65.4            | 65.3            |
| H2      | 4.36            | 4.36            | 4.37            | 4.39            | 4.13            | 4.09            | 4.11            | 4.14            |
| H3      | 4.09            | 4.09            | 4.12            | 4.13            | 4.02            | 4.00            | 4.03            | 4.04            |
| H4      | 3.76            | 3.76            | 3.79            | 3.80            | 3.74            | 3.73            | 3.76            | 3.77            |
| H5      | 3.72            | 3.72            | 3.76            | 3.77            | 3.73            | 3.73            | 3.76            | 3.77            |
| H6      | 3.62            | 3.63            | 3.66            | 3.67            | 3.62            | 3.63            | 3.66            | 3.67            |
| H6      | 3.77            | 3.78            | 3.81            | 3.82            | 3.77            | 3.79            | 3.81            | 3.82            |

## SUPPLEMENTARY REFERENCES

1. Beusch, I., Barraud, P., Moursy, A., Clery, A. & Allain, F.H.T. Tandem hnRNP A1 RNA recognition motifs act in concert to repress the splicing of survival motor neuron exon 7. *Elife* **6**(2017).
2. Loughlin, F.E. et al. Structural basis of pre-let-7 miRNA recognition by the zinc knuckles of pluripotency factor Lin28. *Nature Structural & Molecular Biology* **19**, 84-U105 (2012).
